# Supplementary material for: Skin melanoma survival is not superior in females in the new stage IIID of the 8th edition of the staging system: an analysis of data from the Surveillance, Epidemiology, and End Results (SEER) database
Source: PubMed Central journal article supplement — Ann Transl Med. 2020 Nov;8(21):1381. doi: 10.21037/atm-20-3332 (PMC7723544; doi:10.21037/atm-20-3332), 2020-11
Supplement: atm-08-21-1381-supplementary.pdf [file atm-08-21-1381-supplementary.pdf]

**Supplementary**

**Table S1** Race of patients

| Race (%)                      | All stage III patients (n=8,726) |                  |         | Stage IIID patients (n=505) |                |         |
|-------------------------------|----------------------------------|------------------|---------|-----------------------------|----------------|---------|
|                               | Male (n=5,370)                   | Female (n=3,356) | P value | Male (n=370)                | Female (n=135) | P value |
| White                         | 5,202 (96.9)                     | 3,224 (96.1)     | 0.045   | 350 (94.6)                  | 121 (89.7)     | 0.049   |
| Asian or Pacific Islander     | 81 (1.5)                         | 57 (1.7)         |         | 7 (1.9)                     | 3 (2.2)        |         |
| Black                         | 51 (0.9)                         | 55 (1.6)         |         | 9 (2.4)                     | 11 (8.1)       |         |
| American Indian/Alaska Native | 22 (0.4)                         | 9 (0.3)          |         | 4 (1.1)                     | 0 (0.0)        |         |
| Unknown                       | 14 (0.3)                         | 11 (0.3)         |         | 0 (0.0)                     | 0 (0.0)        |         |

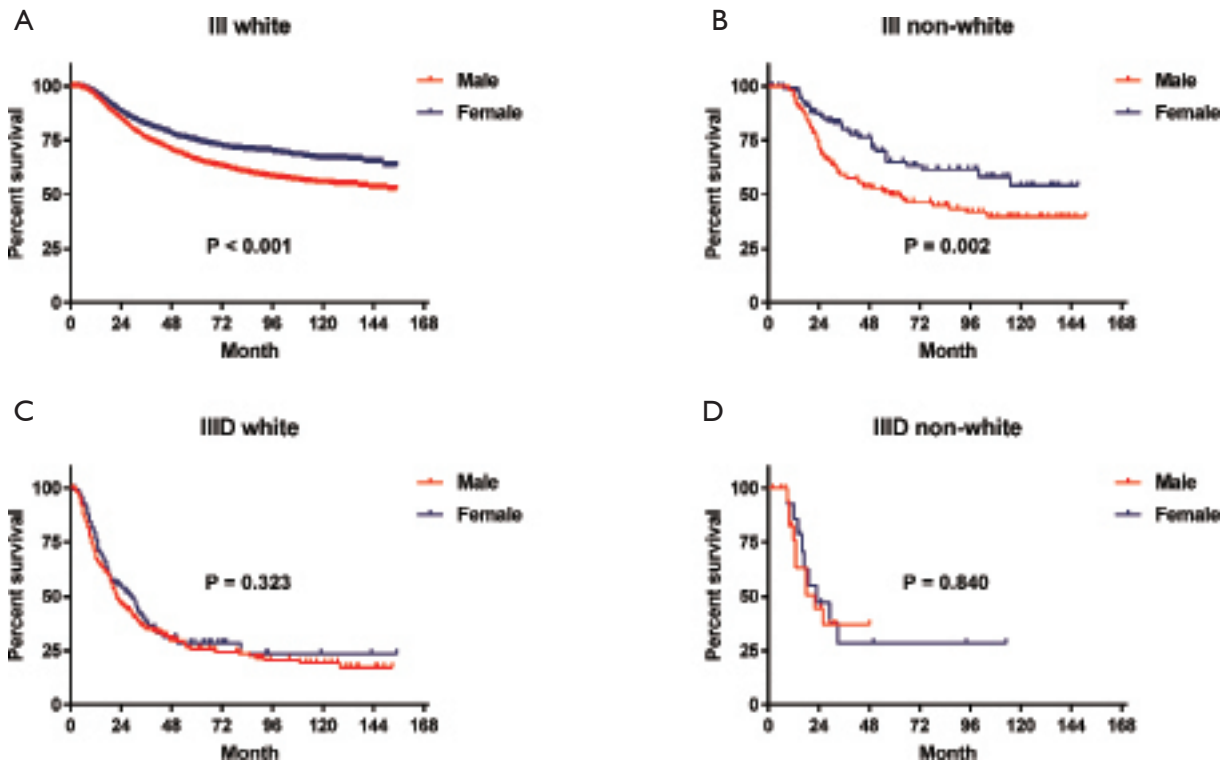

**Figure S1** Long-term MSS based on the 8th edition of the TNM staging system grouped by race. (A) Stage III in white patients; (B) stage III in nonwhite patients; (C) stage IIID in white patients; (D) stage IIID in nonwhite patients.
